# Supplementary material
Source: PubMed Central journal article supplement (PMC3595993)
Supplement: NIHMS51882-supplement-supporting_info.pdf [file NIHMS51882-supplement-supporting_info.pdf]

**Supplementary Figure 1 : Characterization of THP-1-Vpx cell line**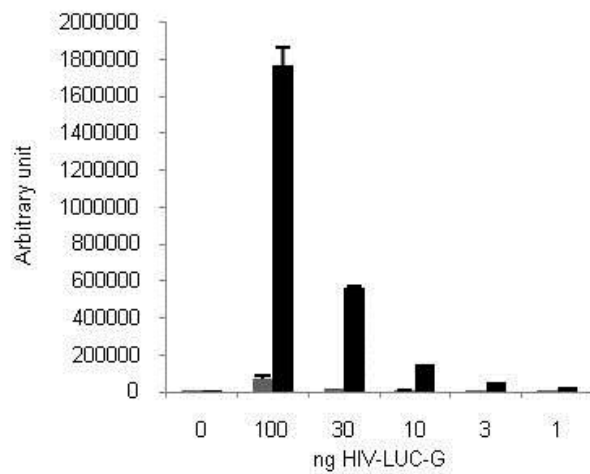

THP-1 and THP-1-Vpx cells were PMA-differentiated for 16 hrs and infected with serial dilutions of HIV-LUC-G. Luciferase activity was measured 24 hrs post infection, normalized for protein concentration of analyzed samples. Results are presented as arbitrary units. Graphs show mean  $\pm$  Standard Deviation from a representative experiment, n=6)

**Supplementary Figure 2: VLP-Vpx-treatment of HeLa cells decreases Samhd1 protein levels.**

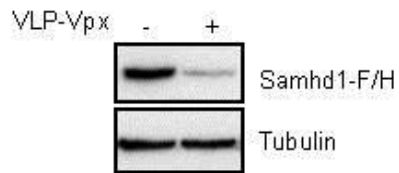

HeLa-Samhd1 cells were treated with VLP-Vpx for 2hrs prior to whole cell extraction and analysis by WB using antibodies allowing for detection of Samhd1-F/H and tubulin.

**Supplementary Figure 3: Vpx variants ability to degrade Samhd1 correlates with their ability to facilitate infection of differentiated THP-1 and can be reconstituted in HeLa cells.**

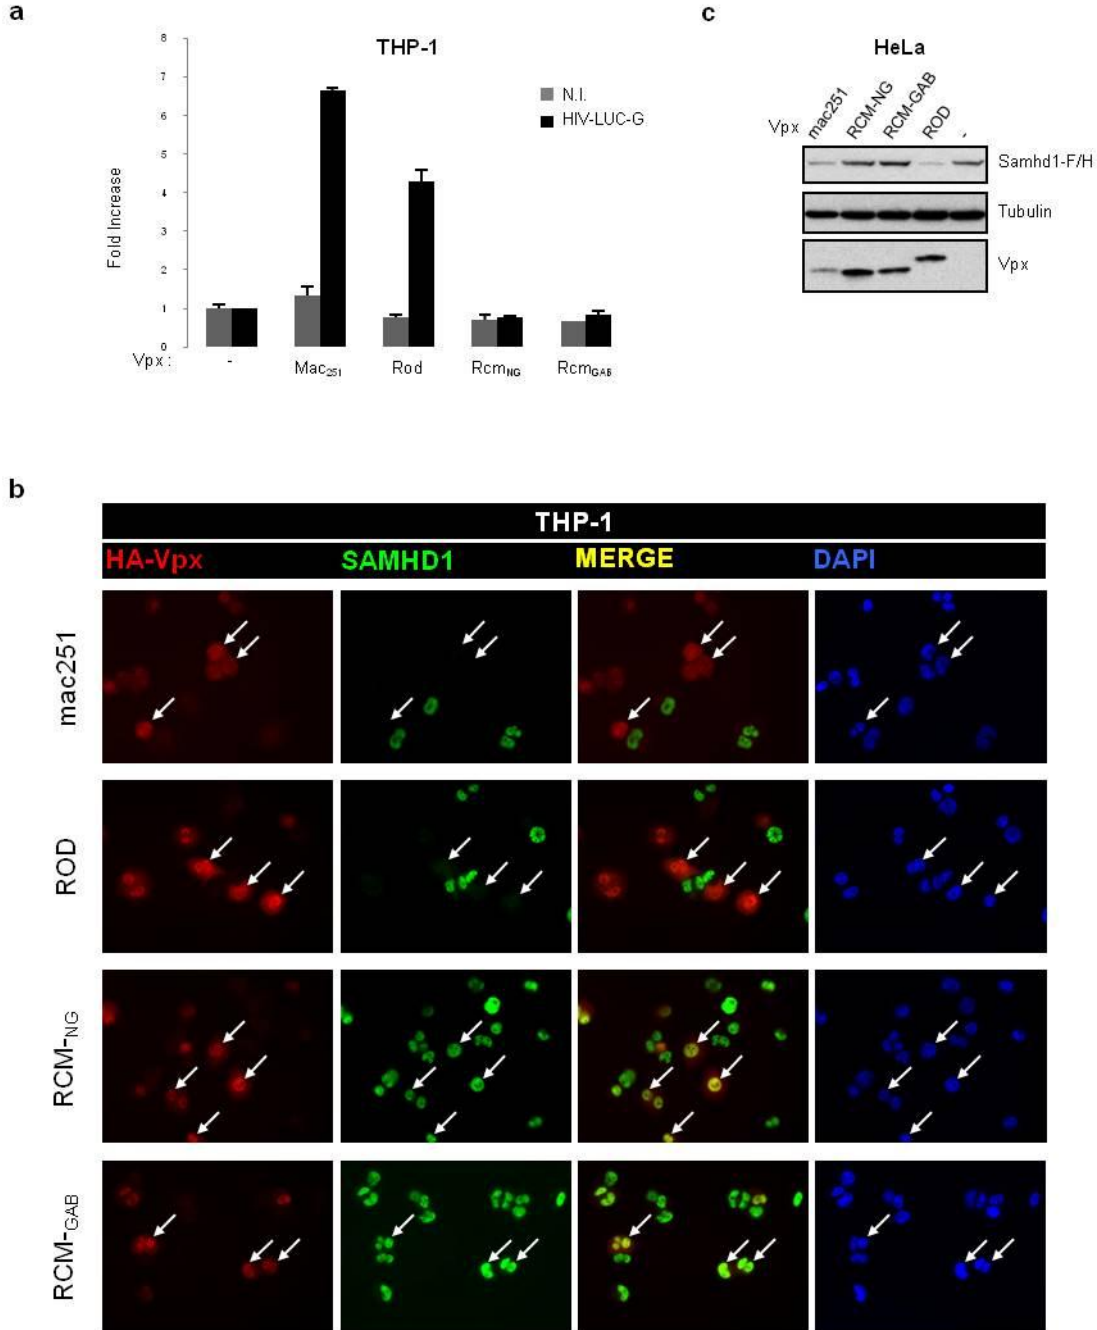

**d**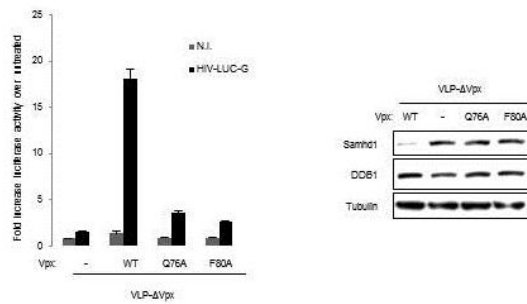

**a**, THP-1 cells were transduced with Vpx variants for 24 hrs, differentiated for a further 16 hrs prior to infection with HIV-LUC-G. Luciferase activity was measured and expressed as in Fig.S. Graphs show mean  $\pm$  Standard Deviation from a representative experiment, n=4). **b**, Immunofluorescence against Flag- and HA-tagged Vpx variants and Samhd1 in THP-1 cells. Images are representative of 150 HA-positive analyzed cells. Vpx<sub>mac251</sub>- and Vpx<sub>ROD</sub>-expressing cells show dramatically reduced Samhd1 staining. Vpx<sub>RCM-NG</sub>- and Vpx<sub>RCM-GAB</sub>-expressing cells show no evident alteration of Samhd1 staining. **c**, HeLa cells were engineered to stably express Flag- and HA-tagged Samhd1 (HeLa- Samhd1). HeLa- Samhd1 were transduced with a retroviral vector expressing Vpx variants for 24 hrs. Whole cell extracts were prepared and analysis by WB for the expression of Samhd1-F/H, DDB1 and Tubulin using specific antibodies. **d**, Vpx-Q76A and Vpx-F80A fail to increase HIV infection and to decrease Samhd1 expression. Differentiated THP1 cells were treated with VLP-ΔVpx (-) or VLP-ΔVpx containing WT Vpx (WT) or VpxQ76A (Q76A) or VpxF80A (F80A) for 2 hrs prior to infection with 100 ng HIV-LUC-G. Luciferase activity was measured 24 hrs later, normalized for protein concentration. Results are expressed as fold increase luciferase activity over infected untreated cells (left panel) Graphs show mean  $\pm$  Standard Deviation from a representative experiment, n=3). Cells from **d** were lysed and analyzed by WB using the indicated antibodies (right panel).

#### Supplementary Figure 4: WB analysis of Samhd1 levels in THP-1 stably expressing shRNA 1 to 5 targeting Samhd1 or scrambled shRNA

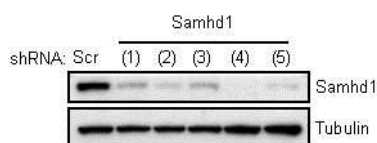

THP-1 cells were transduced with lentiviruses encoding scrambled shRNA or Samhd1 specific shRNAs. Stable cell lines were selected, whole cell extracts were prepared and analyzed by WB with the indicated antibodies.

**Supplementary Figure 5: WB analysis of THP-1-shSamhd1 or THP-1shScr treated or not with VLP-Vpx**

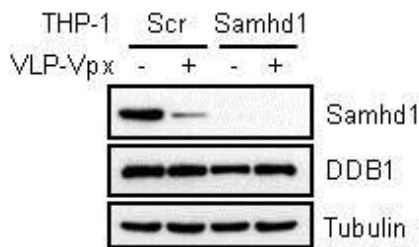

Cells from Fig 2 **b** were analyzed by WB with the indicated antibodies.

**Supplementary Figure 6: Rescue of THP-1-shSamhd1 with ShRNA-resistant Samhd1 mutant (Samhd1-R).**

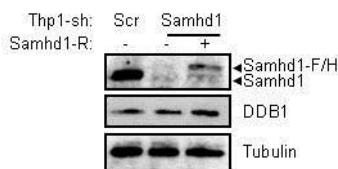

Cells from Fig 2 **d**, were analyzed by WB using Samhd1, DDB1 and Tubulin specific antibodies.

**Supplementary Figure 7: Samhd1-mediated HIV-1 restriction can be reconstituted in permissive HeLa cells.**

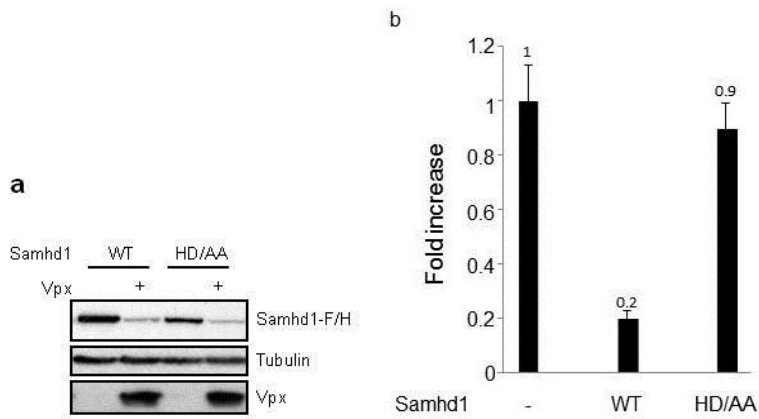

**a**, HeLa cells were transduced with Samhd1-F/H or Samhd1-HD/AA 24 hrs prior to transduction with Vpx<sub>mac251</sub>. Cells were harvested 24 hrs later and whole cell extracts were analyzed by WB with antibodies allowing for detection of Samhd1-F/H, Tubulin and Vpx. **b**, HeLa cells were transduced with Samhd1-F/H or Samhd1-HD/AA 24 hrs prior to infection with HIV-LUC-G. Luciferase activity was measured. Results are expressed as fold increase luciferase activity in transduced over parental HeLa cells. Graphs show mean  $\pm$  Standard Deviation from a representative experiment, n=4)

### Supplementary Figure 8: Expression of WT-Samhd1 and Samhd1-HD/AA in U937.

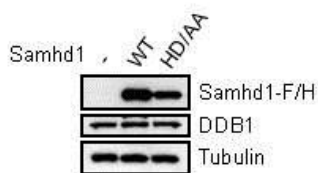

Cells from Fig 2 e were analyzed by WB with the indicated antibodies.

### Supplementary Figure 9: VLP-Vpx treatment of monocyte-derived macrophages (MDM) causes increased HIV-1 infection and a decrease of Samhd1 levels

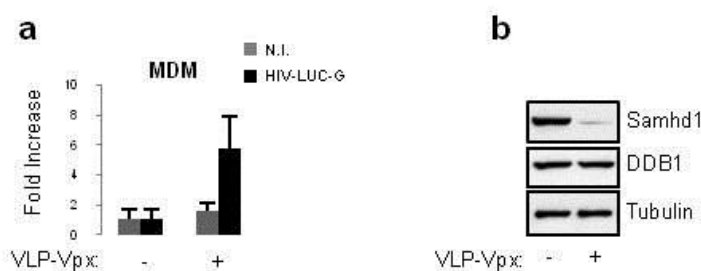

**a**, MDMs were VLP-treated for 2 hrs prior to infection with HIV-LUC-G. Luciferase was measured 48 hrs post infection. Results are expressed as fold increase luciferase activity in VLP-Vpx treated over untreated cells. Graphs show mean  $\pm$  Standard Deviation from a representative experiment, n=3). **b**, Cells from **a**, were analyzed by WB with indicated antibodies.

## Supplementary Figure 10: Samhd1 depletion in MDDCs enhanced their susceptibility to HIV-1.

Supplementary 10

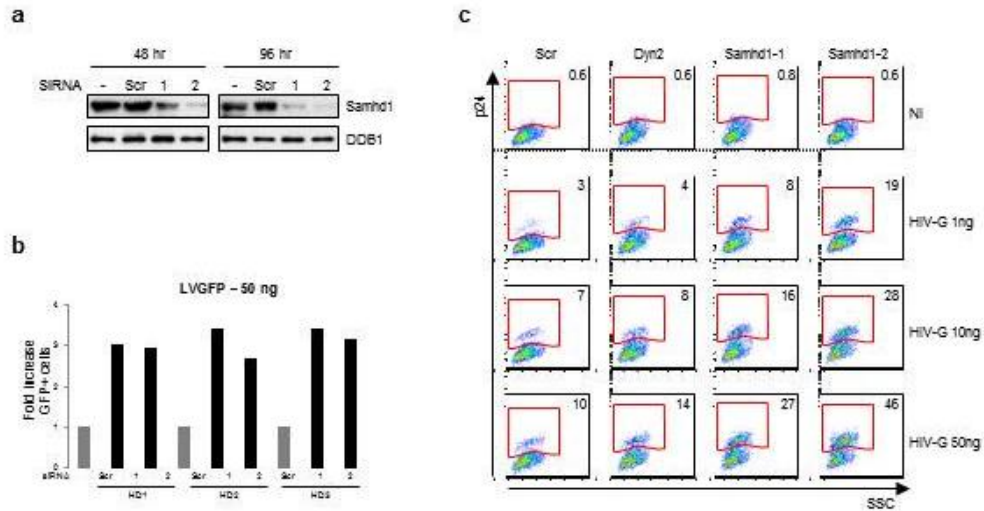

**a**, MDDCs treated as in Fig. 3D were analyzed by WB with indicated antibodies.

**b**, HD1, HD2 and HD3 were treated and analyzed as in Fig. 2 e, except that infection was performed with 50 ng LV-GFP. Results are expressed as fold increase of GFP positive cells.

**c**, HIV-G-infected MDDCs from HD 5 were stained for p24 expression prior to flow cytometry analysis. All infections were performed at 48 hrs post siRNA treatment
